# Supplementary material for: A versatile water vapor generation module for vapor isotope calibration and liquid isotope measurements
Source: Copernicus journal article supplement (doi:10.5194/amt-17-4391-2024), 2024-07-25
Supplement: Supplementary file 1 [file amt-17-4391-2024-supplement.pdf]

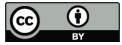

*Supplement of*

## **A versatile water vapor generation module for vapor isotope calibration and liquid isotope measurements**

**Hans Christian Steen-Larsen and Daniele Zannoni**

*Correspondence to:* Hans Christian Steen-Larsen ([hans.christian.steen-larsen@uib.no](mailto:hans.christian.steen-larsen@uib.no))

The copyright of individual parts of the supplement might differ from the article licence.

**Supplementary text:**

V1\_x are manifold-mounted three way solenoid valves (SMC, VO307-6DZ1-Q, VV307-01-043-01N-F)

V2\_x, V3\_x, V4\_x are manifold-mounted solenoid valves (SMC, VDW23-6W-1-G-Q, VV2DW2-G0401N-F-Q)

Humidity sensor is obtained by combining temperature sensor (Analog Devices, AD22100STZ) and relative humidity (Honeywell, HHH-4000-004).

MFC1 and MFC2 are mass flow controllers for air (Aalborg, model GFC17A)

Dual-valve electronic pressure controller is ALICAT model PCD-5PSIG

Vacuum pump is KNF membrane pump model NMP830KPDC

PID control is achieved by LabVIEW software.

## Supplementary Tables:

| Name | $\delta D$<br>(‰)  | $\delta^{17}O$<br>(‰) | $\delta^{18}O$<br>(‰) | d-excess<br>(‰) | $\Delta^{17}O$<br>(per meg) |
|------|--------------------|-----------------------|-----------------------|-----------------|-----------------------------|
| FL0  | 6.47               | -                     | 0.56                  | 2               | -                           |
| BER  | $-2.10 \pm 0.17$   | $-0.05 \pm 0.02$      | $-0.25 \pm 0.02$      | 4               | 82                          |
| SW   | $-75.63 \pm 0.17$  | -5.5558               | $-10.56 \pm 0.02$     | 9               | 34                          |
| FL1  | -81.1              | -                     | -11.65                | 12              | -                           |
| WW   | $-268.30 \pm 0.31$ | -17.9710              | $-33.881 \pm 0.03$    | 2               | 26                          |
| FL2  | -308.14            | -                     | -40.06                | 12              | -                           |
| SP   | -435.31            | -29.6497              | -55.39                | 8               | -11                         |
| AW   | -                  | -                     | -                     |                 | 17                          |

**Table S1: Standards used in this study. Precision ( $\pm$ ) is the standard error.**

| Name | SW<br>(g) | WW<br>(g) | Ratio  | $\Delta^{17}O$<br>(ppm) |
|------|-----------|-----------|--------|-------------------------|
| M20  | 15.85     | 3.99      | 0.2011 | $21 \pm 13$             |
| M50  | 9.93      | 9.93      | 0.5000 | $12 \pm 13$             |
| M85  | 16.96     | 2.98      | 0.8506 | $18 \pm 13$             |

**Table S2: Samples used to perform  $\Delta^{17}O$  tests. M20 - M85 resulted from a mixture of SW and WW. Ratio is  $WW_{mass}/(SW_{mass}+WW_{mass})$ .**

| <b>Name</b> | <b>Start<br/>(Oct. 2022)</b> | <b>Stop<br/>(Oct. 2022)</b> | <b>Holder #</b> | <b>Duration<br/>(hours)</b> | <b>H<sub>2</sub>O mean</b> | <b>H<sub>2</sub>O std</b> | <b>n</b> |
|-------------|------------------------------|-----------------------------|-----------------|-----------------------------|----------------------------|---------------------------|----------|
| SP          | 10 16:18                     | 10 20:18                    | 1               | 4                           | 17353                      | 118                       | 13790    |
| BER-01      | 10 20:18                     | 11 04:18                    | 2               | 8                           | 17296                      | 215                       | 27634    |
| BER-02      | 11 04:18                     | 11 12:18                    | 3               | 8                           | 17163                      | 410                       | 27652    |
| BER-03      | 11 12:18                     | 11 19:18                    | 4               | 7                           | 17143                      | 571                       | 24202    |
| BER-04      | 11 19:18                     | 12 02:18                    | 2               | 7                           | 17067                      | 310                       | 24215    |
| BER-05      | 12 02:18                     | 12 09:18                    | 3               | 7                           | 17177                      | 120                       | 24223    |
| BER-06      | 12 09:18                     | 12 16:18                    | 4               | 7                           | 17186                      | 560                       | 24224    |
| BER-07      | 12 16:18                     | 12 23:18                    | 2               | 7                           | 17265                      | 168                       | 24228    |
| BER-08      | 12 23:18                     | 13 06:18                    | 3               | 7                           | 17232                      | 349                       | 24243    |
| BER-09      | 13 06:18                     | 13 13:18                    | 4               | 7                           | 17239                      | 318                       | 24222    |
| BER-10      | 13 13:18                     | 13 20:18                    | 2               | 7                           | 17242                      | 146                       | 24208    |
| BER-11      | 13 21:00                     | 14 04:42                    | 3               | 7                           | 17256                      | 353                       | 26609    |
| BER-12      | 14 04:42                     | 14 11:42                    | 4               | 7                           | 17380                      | 113                       | 24189    |
| BER-13      | 14 11:42                     | 14 12:24                    | 2               | <1                          | 17460                      | 204                       | 2418     |

**Table S3: Sequence of standard injected for the long term stability test.**

| <b>H<sub>2</sub>O avg.<br/>(ppmv)</b> | <b>H<sub>2</sub>O 1<math>\sigma</math><sub>1-sec</sub><br/>(ppmv)</b> | <b>RSD<br/>(%)</b> | <b><math>\Delta</math>H<sub>2</sub>O/<math>\Delta</math>t<br/>(ppmv/h)</b> | <b>Duration<br/>(h)</b> |
|---------------------------------------|-----------------------------------------------------------------------|--------------------|----------------------------------------------------------------------------|-------------------------|
| 584                                   | 44                                                                    | 7.5                | 2                                                                          | 6.1                     |
| 995                                   | 30                                                                    | 3.0                | 11                                                                         | 4.9                     |
| 2421                                  | 101                                                                   | 4.2                | 29                                                                         | 5.8                     |
| 4538                                  | 18                                                                    | 0.4                | 10                                                                         | 4.5                     |
| 7026                                  | 82                                                                    | 1.2                | 24                                                                         | 7.3                     |
| 8902                                  | 44                                                                    | 0.5                | 10                                                                         | 5.0                     |
| 11001                                 | 47                                                                    | 0.4                | -1                                                                         | 6.9                     |
| 11584                                 | 63                                                                    | 0.5                | -5                                                                         | 3.5                     |
| 13856                                 | 54                                                                    | 0.4                | 24                                                                         | 5.6                     |
| 16047                                 | 89                                                                    | 0.6                | -1                                                                         | 8.7                     |
| 17902                                 | 89                                                                    | 0.5                | -18                                                                        | 3.8                     |
| 19616                                 | 110                                                                   | 0.6                | -24                                                                        | 5.4                     |

Table S4: Humidity levels selected to test the short term performances of the vapor generation module. H<sub>2</sub>O 1 $\sigma$ <sub>1-s</sub> is one standard deviation calculated at standard sampling rate (~1 Hz). RSD stands for relative standard deviation.

For panels (a) and (b)

| <b>Data</b>                | <b>off</b>       | <b>a</b>          | <b>b</b>         | <b>R<sup>2</sup></b> |
|----------------------------|------------------|-------------------|------------------|----------------------|
| <b>δ<sup>18</sup>O FL0</b> | 0.0327 ± 0.0167  | -9.3335 ± 4.5600  | -0.0054 ± 0.0009 | 0.9782               |
| <b>δ<sup>18</sup>O FL1</b> | 0.0292 ± 0.0316  | -1.8082 ± 0.454   | -0.0016 ± 0.0004 | 0.9718               |
| <b>δ<sup>18</sup>O FL2</b> | -0.0141 ± 0.0610 | -4.4829 ± 0.6220  | -0.0019 ± 0.0003 | 0.9965               |
|                            |                  |                   |                  |                      |
| <b>δD FL0</b>              | 0.2708 ± 0.2230  | 15.4957 ± 2.5800  | -0.0020 ± 0.0003 | 0.9805               |
| <b>δD FL1</b>              | -0.1496 ± 0.0859 | 17.3759 ± 8.4800  | -0.0031 ± 0.0007 | 0.9587               |
| <b>δD FL2</b>              | 0.0391 ± 0.0859  | -14.3201 ± 1.3100 | -0.0022 ± 0.0002 | 0.9953               |

For panels (c) and (d)

| <b>Data</b>               | <b>off</b>      | <b>a</b>         | <b>b</b>         | <b>R<sup>2</sup></b> |
|---------------------------|-----------------|------------------|------------------|----------------------|
| <b>δ<sup>18</sup>O SD</b> | 0.4171 ± 0.0179 | 3.7372 ± 0.2340  | -0.0019 ± 0.0001 | 0.9943               |
| <b>δD SD</b>              | 1.2720 ± 0.1060 | 13.8565 ± 0.9990 | -0.0017 ± 0.0001 | 0.9778               |

**Table S5: Results of the best fits are reported in Figure 6 of the manuscript. Coefficients reported with standard error. H<sub>2</sub>O is the mixing ratio in ppmv measured by the CRDS analyzer against the best fit equation: off+a\*expb\*H<sub>2</sub>O**

# Supplementary Figures

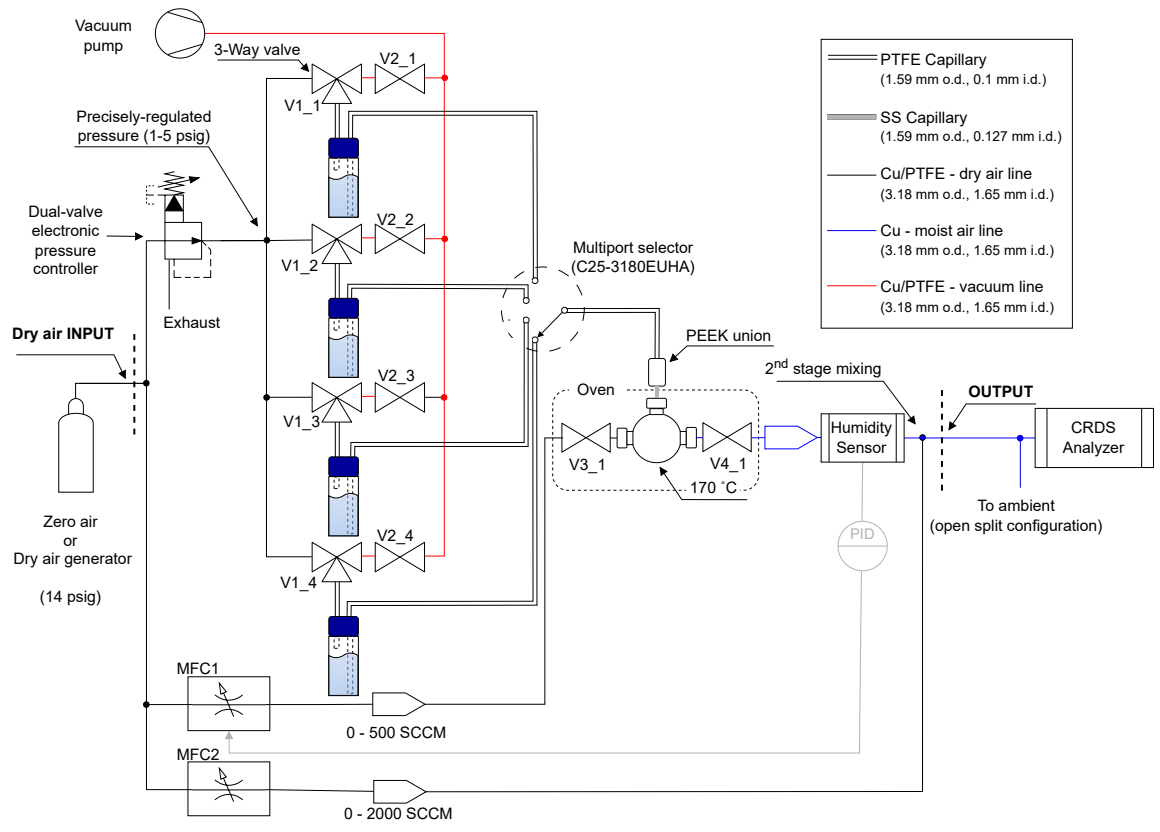

**Figure S1: Sketch of the vapor generation module equipped with single oven using Multiport selector.**

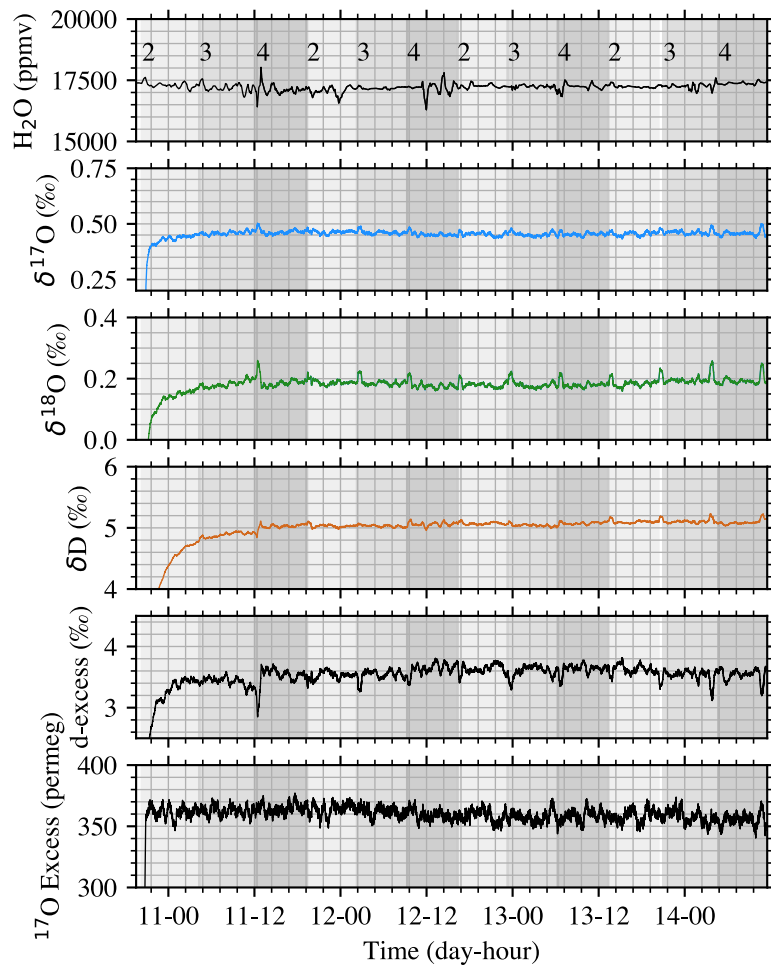

**Figure S2:** The temporal evolution in the different parameters (Humidity, d<sup>17</sup>O, d<sup>18</sup>O, dD, d-excess, <sup>17</sup>O-excess) used to generate the Allan Deviation Figure 3 when applied a rolling averaging window of 1800 s.



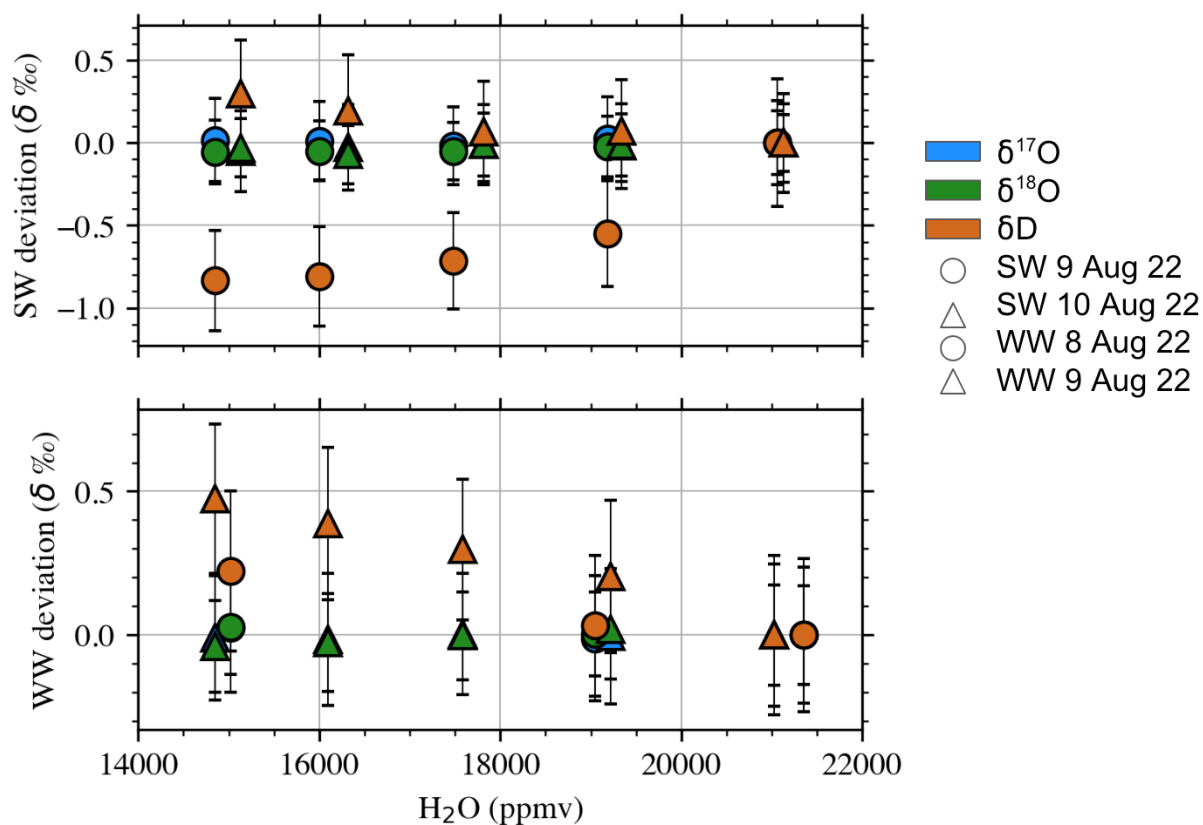

**Figure S3: Humidity - Isotope response for SW and WW standards.** The humidity-isotope response was investigated for SW and WW standards between 15000 - 22000 ppmv. The figure shows the deviation of the raw isotopic signal for each standard at different humidity levels. The deviation was calculated against the highest humidity value for each run. Different symbols represent different runs (8 - 9 Aug for WW, 9-10 Aug for SW). Error bars are the standard deviation of the raw signal for each level, as measured at 1 second resolution.

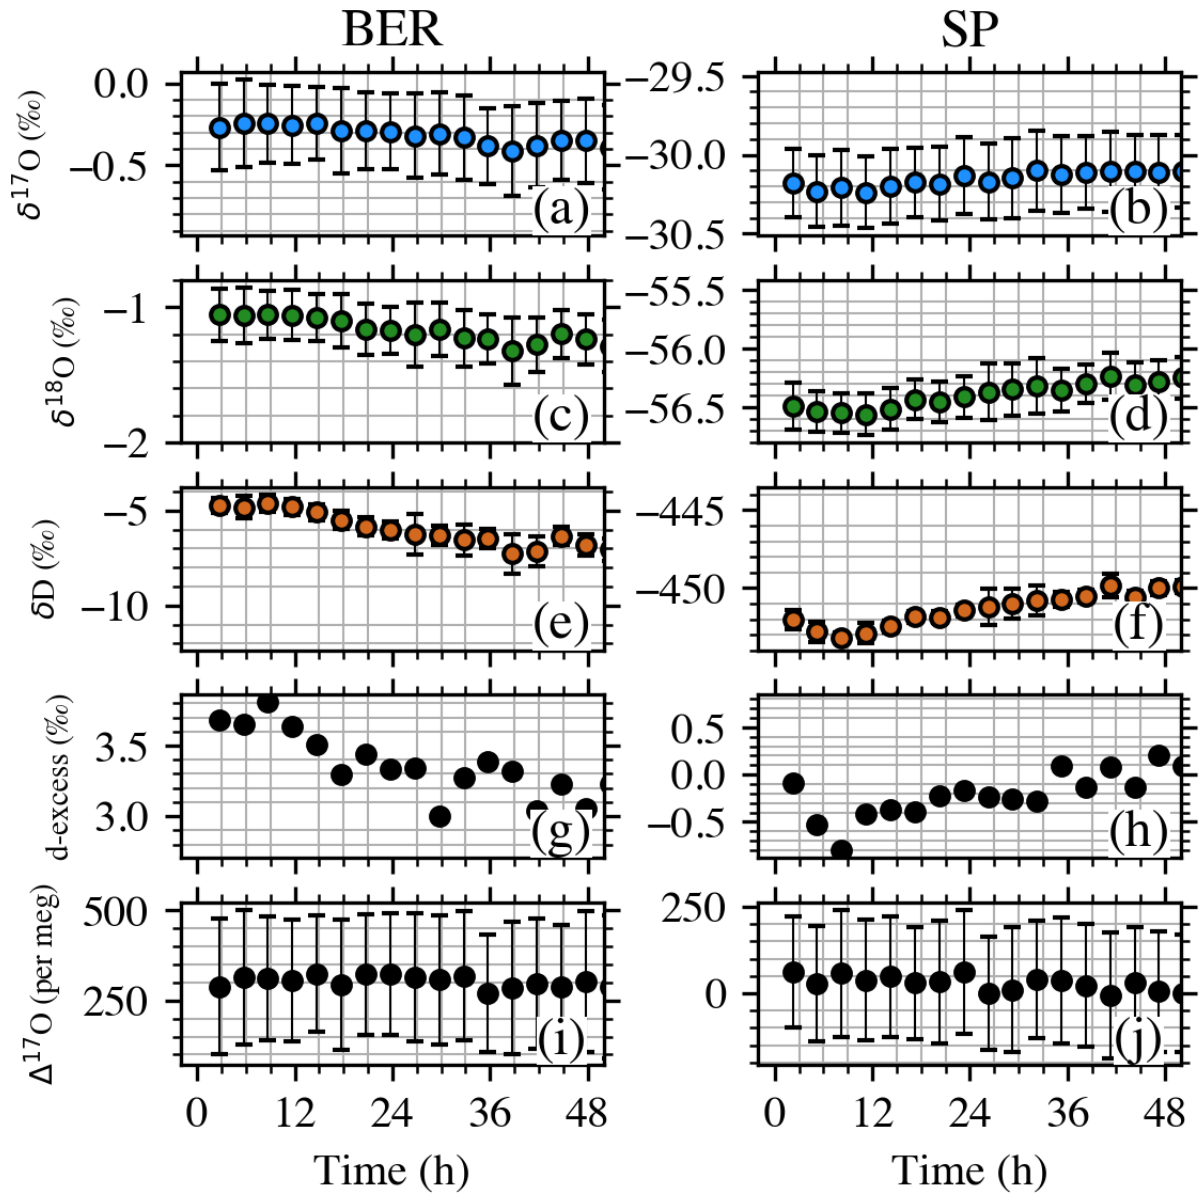

**Figure S4:** Pulse train test performed with a single oven and a four position selector. Similarly to Figure 8 in the manuscript, results reported as average  $\pm$  standard error calculated for the last 5 minutes of  $\delta^{17}\text{O}$  (a and b),  $\delta^{18}\text{O}$  (c and d),  $\delta\text{D}$  (e and f), d-excess (g and h) and  $\Delta^{17}\text{O}$  (i and j) signals.

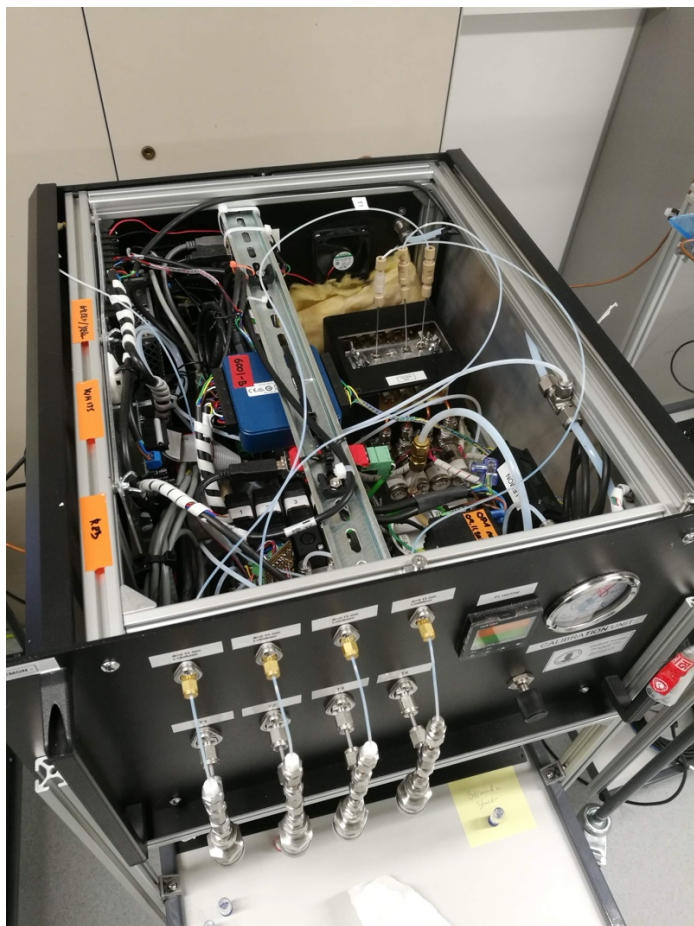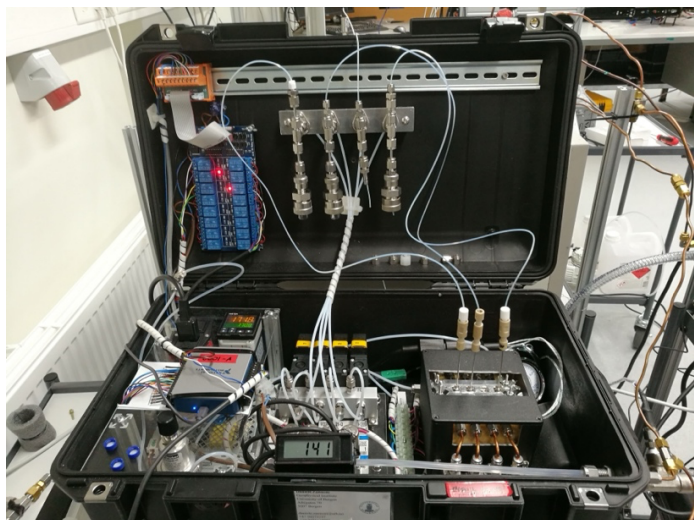

**Figure S5: Photo of the vapor generation module as rack mountable version (top) and travel version in a pelican case (bottom) allowing it to go be checked-in as regular luggage.**
